# Supplementary material for: Socio-Ecological Natural Experiment with Randomized Controlled Trial to Promote Active Commuting to Work: Process Evaluation, Behavioral Impacts, and Changes in the Use and Quality of Walking and Cycling Paths
Source: MDPI journal article supplement (doi:10.3390/ijerph16091661), 2019-05-13
Supplement: s2 [file s2]

Archive with 5 entries (4 files):
- ijerph-501375-SI/
- ijerph-501375-SI/File S1
- ijerph-501375-SI/Table S1
- ijerph-501375-SI/Table S2
- ijerph-501375-SI/Table S3
