# Supplementary material for: Socio-Ecological Natural Experiment with Randomized Controlled Trial to Promote Active Commuting to Work: Process Evaluation, Behavioral Impacts, and Changes in the Use and Quality of Walking and Cycling Paths
Source: MDPI journal article supplement (doi:10.3390/ijerph16091661), 2019-05-13
Supplement: s2 [file s2 › ijerph-501375-SI/File S1]

## KÄPY-study

# TRAVEL DIARY

Use the diary on the same days that you use the activity monitor.  
Table below contains one row per day. Enter following information to each row:

1. The date you used the activity monitor and whether it was a working day at workplace, working day at home, travelling day or non-working day.
2. The time you started and ended your journey to and from work (hours:minutes).
3. Travel modes you used during your journeys to and from work. Enter the modes by using the numbers listed on the right side table. Separate each mode with a comma.
4. The time your working time started and ended (hours:minutes).

### TRAVEL MODES

- 1 = walking
- 2 = cycling
- 3 = actively some other way
- 4 = car
- 5 = bus
- 6 = train
- 7 = moped / motorcycle
- 8 = other motorized vehicle

| Date | T = working day at workplace<br>E = working day at home<br>M = travelling day<br>V = non-working day | JOURNEY TO WORK |       |              | WORKING TIME |       | JOURNEY FROM WORK |       |              |
|------|------------------------------------------------------------------------------------------------------|-----------------|-------|--------------|--------------|-------|-------------------|-------|--------------|
|      |                                                                                                      | Started         | Ended | Travel modes | Started      | Ended | Started           | Ended | Travel modes |
| /    |                                                                                                      | :               | :     |              | :            | :     | :                 | :     |              |
| /    |                                                                                                      | :               | :     |              | :            | :     | :                 | :     |              |
| /    |                                                                                                      | :               | :     |              | :            | :     | :                 | :     |              |
| /    |                                                                                                      | :               | :     |              | :            | :     | :                 | :     |              |
| /    |                                                                                                      | :               | :     |              | :            | :     | :                 | :     |              |
| /    |                                                                                                      | :               | :     |              | :            | :     | :                 | :     |              |
| /    |                                                                                                      | :               | :     |              | :            | :     | :                 | :     |              |

## FITNESS TEST BY WALKING

1. First warm up first by walking slowly a period that feels appropriate.
2. Then walk 6 minutes as fast as you can.
3. Finally cool down by walking slowly a period that feels appropriate to you.

| Date | Started | Ended |
|------|---------|-------|
| /    | :       | :     |

If you are unsure about the suitability of the test for your health, please contact your occupational health.

Include warm-up and cool-down periods in the time you started and ended the test.
