# Supplementary material for: Socio-Ecological Natural Experiment with Randomized Controlled Trial to Promote Active Commuting to Work: Process Evaluation, Behavioral Impacts, and Changes in the Use and Quality of Walking and Cycling Paths
Source: MDPI journal article supplement (doi:10.3390/ijerph16091661), 2019-05-13
Supplement: s2 [file s2 › ijerph-501375-SI/Table S2]

**Table S2. Assessment of behavioural impacts at baseline and follow-up questionnaire to the employees**.

| **Indicator** | **Response alternatives** | | | | | |
| --- | --- | --- | --- | --- | --- | --- |
| **Primary mean of transportation to and from work** |  | | | | | |
| What is the main travel mode you use when you go to work (most of the kilometres)? | Car/ Bus / Moped or motorcycle/ Train/ Walking/ Bicycling/ Other, what? | | | | | |
| What is the main travel mode you use when you come back from work (most of the kilometres)? | Car / Bus / Moped or motorcycle/ Train/ Walking/ Bicycling/ Other, what? | | | | | |
| **Weekly number of days actively commuting** |  | | | | | |
| On how many days a week do you walk (or jog or run) or cycle the whole journey to and from work? | | | | | | |
| - I walk to and from work | 0 days | 1 | 2 | 3 | 4 | 5 days a week |
|  | The proportion of walking is approximately _____ km and it takes about ______ minutes. | | | | | |
| - I bicycle to and from work | 0 days | 1 | 2 | 3 | 4 | 5 days a week |
|  | The proportion of bicycling is approximately _____ km and it takes about ______ minutes. | | | | | |
| On how many days a week do you walk (also jogging and running) or bicycle at least part of your journey to work? | | | | | | |
| - I walk to work | 0 days | 1 | 2 | 3 | 4 | 5 days a week |
|  | The proportion of walking is approximately _____ km and it takes about ______ minutes. | | | | | |
| - I bicycle to work | 0 days | 1 | 2 | 3 | 4 | 5 days a week |
|  | The proportion of bicycling is approximately _____ km and it takes about ______ minutes. | | | | | |
| On how many days a week do you walk (also jogging and running) or bicycle at least part of your journey from work? | | | | | | |
| - I walk from work | 0 days | 1 | 2 | 3 | 4 | 5 days a week |
|  | The proportion of walking is approximately _____ km and it takes about ______ minutes. | | | | | |
| - I bicycle from work | 0 days | 1 | 2 | 3 | 4 | 5 days a week |
|  | The proportion of bicycling is approximately _____ km and it takes about ______ minutes. | | | | | |
| **Motivation for ACW** |  | | | | | |
| Would you like to walk or cycle to work more if it was possible?   - walk - bicycle | Yes / No  Yes/ / No | | | | | |
| At the moment, do you have an opportunity to walk or cycle to work at least part of the journey?   - walk - bicycle | Yes / No, why?  Yes / No, why? | | | | | |
| On how many days in the next week do you intend to walk or cycle to work at least part of the journey? | | | | | | |
| - To walk | 0 days | 1 | 2 | 3 | 4 | 5 days a week |
| - To bicycle | 0 days | 1 | 2 | 3 | 4 | 5 days a week |
| **Injuries related to active travel to work** |  | | | | | |
| During the past six months have you had any injuries related to active travel to work? | Yes, what kind? / No | | | | | |
