# Supplementary material for: Socio-Ecological Natural Experiment with Randomized Controlled Trial to Promote Active Commuting to Work: Process Evaluation, Behavioral Impacts, and Changes in the Use and Quality of Walking and Cycling Paths
Source: MDPI journal article supplement (doi:10.3390/ijerph16091661), 2019-05-13
Supplement: s2 [file s2 › ijerph-501375-SI/Table S3]

**Table S3. Strategies planned by the workplaces.**

| **Strategies by level** | **Workplaces (1-8)** | | | | | | | |
| --- | --- | --- | --- | --- | --- | --- | --- | --- |
| **1** | **2** | **3** | **4** | **5** | **6** | **7** | **8** |
| **ORGANIZATION** | | | | | | | | |
| Engaging occupational health care in ACW promotion | x | x |  |  |  |  | x |  |
| Offering a kick-off lecture on ACW | x | x | x | x | x | x | x |  |
| Providing a free breakfast campaign in collaboration with the restaurant staff | x | x | x | x |  |  |  |  |
| Improving conditions for drying clothes |  | x |  |  |  |  | x |  |
| Posters and table triangles supporting ACW | x | x | x | x | x | x | x | x |
| Shared bicycles for work-related errands | x |  |  |  |  |  |  |  |
| Purchasing new bicycle stands |  | x |  |  |  |  |  |  |
| Providing bicycle repair tools for the collective use |  |  |  |  |  |  | x |  |
| Providing bicycle maintenance tools for the collective use |  |  | x | x |  |  |  |  |
| Providing safety reflectors, anti-slips for shoes etc. | x |  |  | x |  |  |  |  |
| **WORKING UNIT** | | | | | | | | |
| Nominating a person in change for ACW | x |  | x | x |  | x | x |  |
| Reminding about and encouraging to ACW in emails and meetings | x | x | x | x | x | x | x | x |
| Offering experiences and ideas of ACW in weekly or monthly emails | x |  | x | x |  |  | x |  |
| Nominating a team for national cycling competition (Kilometrikisa) | x | x | x | x |  |  | x |  |
| Organizing an internal competition for ACW |  |  |  |  |  | x |  |  |
| Providing instruction for ACW in organizations own internal workspace | x |  | x | x |  |  | x |  |
| Reminding about bicycle stands, shower and locker rooms in emails | x | x | x | x | x |  | x |  |
| **INDIVIDUAL** | | | | | | | | |
| Rewarding for ACW | x | x |  | x |  |  | x |  |
| Arranging fitness tests |  | x |  |  |  |  | x |  |
| Providing a paper card for self-monitoring ACW | x |  |  |  |  |  |  |  |
| Providing a bicycle maintenance at workplace | x | x | x | x |  | x | x |  |
| Organizing lotteries for active commuters | x |  |  | x |  | x | x |  |
| **Total number of strategies per workplace** | 16 | 12 | 11 | 14 | 4 | 7 | 15 | 2 |
